# Supplementary material for: lnc-IL7R Expression Reflects Physiological Pulmonary Function and Its Aberration Is a Putative Indicator of COPD
Source: MDPI journal article supplement (doi:10.3390/biomedicines10040786), 2022-03-28
Supplement: s1 [file s1]

Supplementary Table S1. Association of Inc-IL7R, with GOLD COPD severity, and pulmonary function in our cohort (n = 125)

| Univariate       |     |                              | Multivariate, correlation coefficient (95% CI) |                      |                       |                        |                        |                        |                        |                       |                        |  |
|------------------|-----|------------------------------|------------------------------------------------|----------------------|-----------------------|------------------------|------------------------|------------------------|------------------------|-----------------------|------------------------|--|
| Variable         | N   | Mean (95% CI )               | FEV1(%)                                        | FEV1(L)              | FVC(%)                | FVC(L)                 | post-BD_FEV1/FVC       | Total LAA(%)           | %LAA-<br>950insp       | Inc-IL7R              | COPD severity (GOLD)   |  |
| Sex              | 125 | 0.89 ± 0.32 (0.00 – 1.00)    | 0.19 (0.01 – 0.35)                             | 0.30 (0.13 – 0.45)   | 0.23 (0.05 – 0.39)    | 0.36 (0.20 – 0.51)     | 0.05 (–0.13 –0.22)     | –0.05 (–0.22 – 0.13)   | –0.08 (– 0.25 – 0.10)  | –0.003 (–0.19 – 0.19) | –0.22 (– 0.43 –0.02)   |  |
| Age              | 125 | 69.09 ± 7.76 (41.00–87.00)   | –0.02 (– 0.19 –0.16)                           | –0.31 (–0.46– –0.14) | –0.05 (– 0.22 – 0.13) | –0.39 (– 0.53 – –0.23) | –0.06 (–0.23 –0.12)    | 0.04 (–0.14 – 0.21)    | 0.11 (– 0.07 – 0.28)   | –0.09 (–0.27 – 0.10)  | –0.02 (– 0.26 –0.22)   |  |
| BMI              | 122 | 23.54 ± 4.07 (15.80 –36.20)  | 0.21 (0.04 – 0.38)                             | 0.27 (0.10 – 0.43)   | 0.10 (– 0.07 – 0.28)  | 0.18 (0.00 – 0.35)     | 0.30 (0.13 –0.45)      | –0.46 (–0.59 – 0.30)   | –0.47 (– 0.60 – –0.32) | –0.08 (–0.11 – 0.27)  | –0.41 (– 0.59 – –0.19) |  |
| Smoking_Hx       | 125 | 1.384 ± 0.63 (0.00–2.00)     | –0.11 (–0.28 – 0.07)                           | –0.15 (–0.31– 0.03)  | –0.01 (– 0.18 – 0.17) | –0.10 (– 0.28 – 0.07)  | –0.23 (–0.39 – – 0.05) | 0.26 (0.09 –0.42)      | 0.26 (0.09 – 0.42)     | –0.11 (–0.29 – 0.08)  | 0.11 (0.13 –0.34)      |  |
| pack-year        | 125 | 48.98 ± 35.97 (0.00–180.00)  | –0.03 (–0.20 – 0.15)                           | 0.02 (–0.15– 0.20)   | –0.01 (– 0.18 – 0.17) | 0.08 (– 0.09 – 0.26)   | –0.05 (–0.22 –0.13)    | 0.17 (–0.01–0.33)      | 0.17 (–0.01 –0.34)     | –0.04 (–0.23 – 0.15)  | –0.02 (– 0.26 –0.22)   |  |
| FEV1 (%)         | 125 | 56.26 ± 19.16 (17.50–97.70)  |                                                | 0.86 (0.80 – 0.90)   | 0.86 (0.80 – 0.90)    | 0.68 (0.58 – 0.77)     | 0.77 (0.69 –0.83)      | –0.39 (–0.53 – – 0.23) | –0.26 (– 0.42 – –0.09) | 0.52 (0.37 –0.65)     | –0.92 (– 0.95 – –0.88) |  |
| FEV1 (L)         | 125 | 1.41 ± 0.55 (0.43 – 3.07)    |                                                |                      | 0.70 (0.59 – 0.78)    | 0.89 (0.85 – 0.92)     | 0.74 (0.65 –0.81)      | –0.41 (–0.55 – – 0.25) | –0.29 (– 0.45 – –0.13) | 0.37 (0.20 –0.53)     | –0.78 (– 0.86 – –0.67) |  |
| FVC(%)           | 124 | 79.80 ± 18.47 (38.50–117.70) |                                                |                      |                       | 0.71 (0.61 – 0.79)     | 0.37 (0.21 –0.51)      | –0.15 (–0.32 – 0.03)   | –0.09 (– 0.27 – 0.08)  | 0.45 (0.28 –0.59)     | –0.83 (– 0.90 – –0.74) |  |
| FVC(L)           | 124 | 2.51 ± 0.71 (1.20–4.61)      |                                                |                      |                       |                        | 0.41 (0.25 –0.55)      | –0.23 (–0.39 – – 0.05) | –0.15 (– 0.32 – 0.03)  | 0.31 (0.13 –0.47)     | –0.69 (– 0.80 – –0.54) |  |
| post-BD_FEV1/FVC | 125 | 54.66 ± 10.45 (27.00 –69.72) |                                                |                      |                       |                        |                        | –0.57 (–0.68 – – 0.44) | –0.41 (– 0.55 –        | 0.41 (0.24 –0.55)     | –0.66 (– 0.77 – –0.49) |  |

|                    |     |                                |  |  |  |  |  |  |                       |                          |                          |
|--------------------|-----|--------------------------------|--|--|--|--|--|--|-----------------------|--------------------------|--------------------------|
|                    |     |                                |  |  |  |  |  |  | −0.25)                |                          |                          |
| Total LAA (%)      | 125 | 14.71 ± 8.64<br>(0.41 − 45.65) |  |  |  |  |  |  | 0.82<br>(0.75 − 0.87) | −0.35<br>(−0.50 − −0.17) | 0.38<br>(0.15 − 0.56)    |
| %LAA-950insp       | 125 | 1.34 ± 0.73<br>(0.00 − 2.00)   |  |  |  |  |  |  |                       | −0.30<br>(−0.46 − −0.12) | 0.30<br>(0.06 − 0.50)    |
| lnC-IL7R           | 108 | 0.54 ± 0.26<br>(0.005 − 1.23)  |  |  |  |  |  |  |                       |                          | −0.59<br>(−0.74 − −0.38) |
| COPD severity_GOLD | 67  | 1.51 ± 101.0<br>(0.00 − 3.00)  |  |  |  |  |  |  |                       |                          |                          |

COPD, chronic obstructive pulmonary disease; GOLD, Global Initiative for Chronic Obstructive Lung Disease; M, male; F, female; FEV1, forced expiratory volume in 1 s; FVC, forced vital capacity; BMI, body mass index; Hx, history; Post-BD, post-bronchodilator; LAA, low attenuation area; %LAA-950insp, percentages of low attenuation area below − 950 Hounsfield units; GOLD, Global Initiative for Chronic Obstructive Lung Disease. The values of FEV1/FVC % and FEV1 % were analyzed by Kruskal-Wallis tests and Dunn's multiple comparisons

A

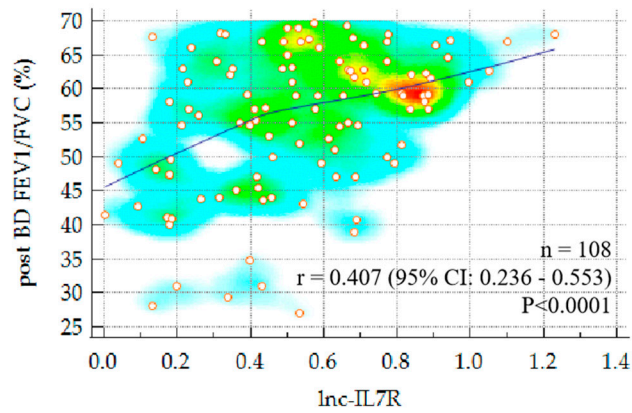

B

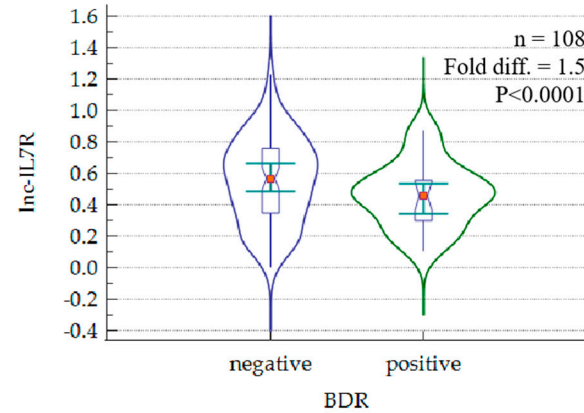

C

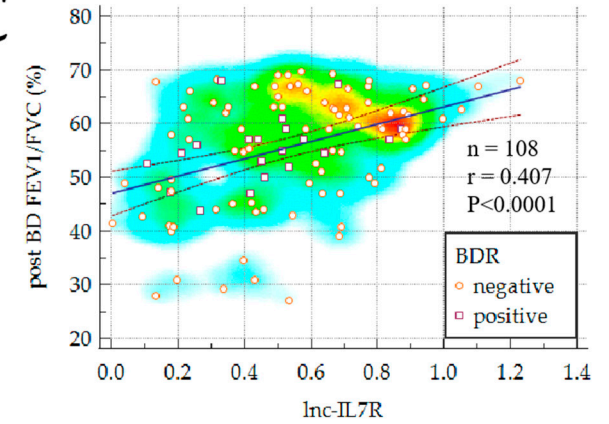

D

## Regression

|               |                                             |
|---------------|---------------------------------------------|
| Dependent Y   | post_BD_FEV1_FVC_%_<br>post BD FEV1/FVC (%) |
| Independent X | Inc_IL7R<br>Inc-IL7R                        |

### Least squares regression

#### All cases

|                                             |        |
|---------------------------------------------|--------|
| Sample size                                 | 108    |
| Coefficient of determination R <sup>2</sup> | 0.1654 |
| Residual standard deviation                 | 9.4755 |

#### Regression Equation

| y = 47.0116 + 16.1211 x |             |            |                    |         |         |  |
|-------------------------|-------------|------------|--------------------|---------|---------|--|
| Parameter               | Coefficient | Std. Error | 95% CI             | t       | P       |  |
| Intercept               | 47.0116     | 2.0909     | 42.8662 to 51.1570 | 22.4840 | <0.0001 |  |
| Slope                   | 16.1211     | 3.5167     | 9.1488 to 23.0933  | 4.5841  | <0.0001 |  |

#### Analysis of Variance

| Source     | DF  | Sum of Squares | Mean Square |
|------------|-----|----------------|-------------|
| Regression | 1   | 1886.7906      | 1886.7906   |
| Residual   | 106 | 9517.3152      | 89.7860     |

|                    |            |
|--------------------|------------|
| F-ratio            | 21.0143    |
| Significance level | P < 0.0001 |

#### Residuals

|                                          |                                                          |
|------------------------------------------|----------------------------------------------------------|
| Chi-squared test for Normal distribution | accept Normality (P=0.8029)<br>(Chi-squared=8.594 DF=13) |
|------------------------------------------|----------------------------------------------------------|

#### Subgroup: BDR = negative

|                                             |         |
|---------------------------------------------|---------|
| Sample size                                 | 88      |
| Coefficient of determination R <sup>2</sup> | 0.1700  |
| Residual standard deviation                 | 10.1639 |

#### Regression Equation

| y = 46.3389 + 16.9432 x |             |            |                    |         |         |  |
|-------------------------|-------------|------------|--------------------|---------|---------|--|
| Parameter               | Coefficient | Std. Error | 95% CI             | t       | P       |  |
| Intercept               | 46.3389     | 2.4767     | 41.4154 to 51.2624 | 18.7101 | <0.0001 |  |
| Slope                   | 16.9432     | 4.0366     | 8.9188 to 24.9677  | 4.1974  | 0.0001  |  |

#### Analysis of Variance

| Source     | DF | Sum of Squares | Mean Square |
|------------|----|----------------|-------------|
| Regression | 1  | 1820.0659      | 1820.0659   |
| Residual   | 86 | 8884.1782      | 103.3044    |

|                    |            |
|--------------------|------------|
| F-ratio            | 17.6185    |
| Significance level | P = 0.0001 |

#### Subgroup: BDR = positive

|                                             |        |
|---------------------------------------------|--------|
| Sample size                                 | 20     |
| Coefficient of determination R <sup>2</sup> | 0.1546 |
| Residual standard deviation                 | 5.7286 |

#### Regression Equation

| y = 50.0128 + 11.7084 x |             |            |                    |         |         |  |
|-------------------------|-------------|------------|--------------------|---------|---------|--|
| Parameter               | Coefficient | Std. Error | 95% CI             | t       | P       |  |
| Intercept               | 50.0128     | 3.2435     | 43.1986 to 56.8270 | 15.4196 | <0.0001 |  |
| Slope                   | 11.7084     | 6.4546     | -1.8522 to 25.2691 | 1.8140  | 0.0864  |  |

#### Analysis of Variance

| Source     | DF | Sum of Squares | Mean Square |
|------------|----|----------------|-------------|
| Regression | 1  | 107.9815       | 107.9815    |
| Residual   | 18 | 590.7006       | 32.8167     |

|                    |            |
|--------------------|------------|
| F-ratio            | 3.2904     |
| Significance level | P = 0.0864 |

**Supplementary Figure S1.** Correlation between Inc-IL7R and bronchodilator response. (A) Scatter diagram showing the correlation between post-BD FEV1/FVC (%) and Inc-IL7R expression in our COPD cohort. (B) Combined notched box-and-whisker and violin plots comparing Inc-IL7R expression profile in patients with negative and positive BDR. (C) Scatter diagram with regression line showing the correlation between BDR-delineated post-BD FEV1/FVC (%) and Inc-IL7R levels in our COPD cohort. (D) Statistical chart showing the regression-based estimation of relationships between post-BD FEV1/FVC (%), BDR status, and Inc-IL7R expression levels in our cohort.
